# Supplementary material for: Alterations of the Gut Microbiome in Chronic Hepatitis B Virus Infection Associated with Alanine Aminotransferase Level
Source: PubMed Central journal article supplement (PMC6407135; doi:10.3390/jcm8020173), 2019-02-02
Supplement: jcm-08-00173-s001.pdf [file jcm-08-00173-s001.pdf]

**Table S1.** Pairwise comparison of alpha diversity by Kruskal-Wallis test.

|               | Group 1    | Group 2    | H     | <i>p</i> -Value | <i>q</i> -Value |
|---------------|------------|------------|-------|-----------------|-----------------|
| Faith PD      | Control    | Normal ALT | 2.000 | 0.157           | 0.399           |
|               |            | High ALT   | 1.237 | 0.265           | 0.399           |
|               | Normal ALT | High ALT   | 0.006 | 0.939           | 0.939           |
| Evenness      | Control    | Normal ALT | 1.392 | 0.238           | 0.238           |
|               |            | High ALT   | 2.052 | 0.152           | 0.228           |
|               | Normal ALT | High ALT   | 4.380 | 0.036           | 0.109           |
| Shannon       | Control    | Normal ALT | 1.341 | 0.247           | 0.337           |
|               |            | High ALT   | 0.922 | 0.337           | 0.337           |
|               | Normal ALT | High ALT   | 2.932 | 0.087           | 0.261           |
| Observed OTUs | Control    | Normal ALT | 1.693 | 0.193           | 0.565           |
|               |            | High ALT   | 0.782 | 0.377           | 0.565           |
|               | Normal ALT | High ALT   | 0.093 | 0.761           | 0.761           |

**Table S2.** Pairwise comparison of beta diversity by PERMANOVA test.

|                    | Group 1    | Group 2    | Pseudo-F | <i>p</i> -Value | <i>q</i> -Value |
|--------------------|------------|------------|----------|-----------------|-----------------|
| Unweighted UniFrac | Control    | Normal ALT | 0.888    | 0.531           | 0.651           |
|                    |            | High ALT   | 0.917    | 0.526           | 0.651           |
|                    | Normal ALT | High ALT   | 0.815    | 0.651           | 0.651           |
| Weighted UniFrac   | Control    | Normal ALT | 0.676    | 0.596           | 0.596           |
|                    |            | High ALT   | 2.815    | 0.041           | 0.062           |
|                    | Normal ALT | High ALT   | 3.648    | 0.013           | 0.039           |

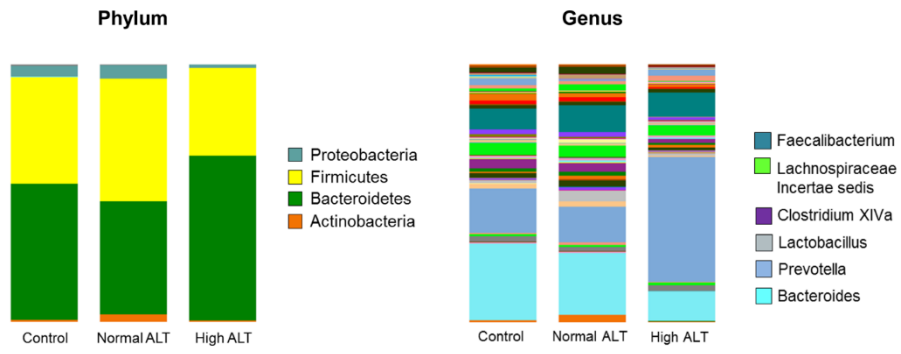

**Figure S1.** Bar chart of the proportional abundance at phylum and genus levels in three categories.
